# Supplementary material
Source: HighWire-hosted journal article supplement (https://erj.ersjournals.com/content/55/2/1901190)
Supplement: inline-supplementary-material-2 [file inline-supplementary-material-2.pdf]

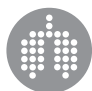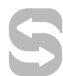

SHAREABLE PDF

# Genetic landscape of adult Langerhans cell histiocytosis with lung involvement

Fan  lie Jouenne<sup>1,2</sup>, Sylvie Chevret<sup>3,4</sup>, Emmanuelle Bugnet<sup>5</sup>,  
Emmanuelle Clappier<sup>6,7</sup>, Gwena  l Lorillon<sup>5</sup>, V  ronique Meignin<sup>8</sup>,  
Aur  lie Sadoux<sup>2</sup>, Shannon Cohen<sup>9</sup>, Alain Hazi  t<sup>9</sup>, Alexandre How-Kit<sup>10</sup>,  
Caroline Kannengiesser <sup>11</sup>, C  leste Lebb  <sup>1,12</sup>, Dominique Gossot<sup>13</sup>,  
Samia Mourah<sup>1,2</sup> and Abdellatif Tazi<sup>1,5</sup>

**Affiliations:** <sup>1</sup>Universit   de Paris, INSERM U976, Institut de Recherche Saint-Louis, Paris, France. <sup>2</sup>Assistance Publique-H  pitaux de Paris, H  pital Saint-Louis, Laboratoire de Pharmacog  nomique, Paris, France. <sup>3</sup>Universit   de Paris, U1153 CRESS,   quipe de Recherche en Biostatistiques et   pid  miologie Clinique (ECSTRRA), Paris, France. <sup>4</sup>Assistance Publique-H  pitaux de Paris, H  pital Saint-Louis, Service de Biostatistique et Information M  dicale, Paris, France. <sup>5</sup>Assistance Publique-H  pitaux de Paris, H  pital Saint-Louis, Centre National de R  f  rence des Histiocytoses, Service de Pneumologie, Paris, France. <sup>6</sup>Assistance Publique-H  pitaux de Paris, H  pital Saint-Louis, Laboratoire d'H  matologie Biologique, Paris, France. <sup>7</sup>Universit   de Paris, INSERM U944, Institut de Recherche Saint-Louis, Paris, France. <sup>8</sup>Assistance Publique-H  pitaux de Paris, H  pital Saint-Louis, Service de Pathologie, INSERM UMR\_S1165, Paris, France. <sup>9</sup>INSERM U1160, Institut de Recherche Saint-Louis, Paris, France. <sup>10</sup>Laboratoire de G  nomique Fonctionnelle, Fondation Jean Dausset – CEPH, Paris, France. <sup>11</sup>Universit   de Paris, Assistance Publique-H  pitaux de Paris, H  pital Bichat, Laboratoire de G  n  tique, Paris, France. <sup>12</sup>Assistance Publique-H  pitaux de Paris, H  pital Saint-Louis, D  partement de Dermatologie, Paris, France. <sup>13</sup>Institut du Thorax Curie-Montsouris, D  partement Thoracique, Institut Mutualiste Montsouris, Paris, France.

**Correspondence:** Abdellatif Tazi, Service de Pneumologie, H  pital Saint-Louis, 1 Avenue Claude Vellefaux, 75475, Paris cedex 10, France. E-mail: [abdellatif.tazi@daphp.fr](mailto:abdellatif.tazi@daphp.fr)

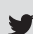

@ERSpublications

MAPK alterations are present in most lesions from adult pulmonary LCH patients. In patients with refractory progressive disease, the identification of these alterations, including *BRAF* deletions, is important to guide the choice of targeted treatment. <http://bit.ly/2Qoknsn>

**Cite this article as:** Jouenne F, Chevret S, Bugnet E, *et al.* Genetic landscape of adult Langerhans cell histiocytosis with lung involvement. *Eur Respir J* 2020; 55: 1901190 [<https://doi.org/10.1183/13993003.01190-2019>].

This single-page version can be shared freely online.

**ABSTRACT** The clinical significance of the *BRAF*<sup>V600E</sup> mutation in adult Langerhans cell histiocytosis (LCH), including pulmonary Langerhans cell histiocytosis (PLCH), is not well understood. Similarly, the spectrum of molecular alterations involved in adult LCH has not been fully delineated. To address these issues, we genotyped a large number of adult LCH biopsies and searched for an association of identified molecular alterations with clinical presentation and disease outcome.

Biopsies from 117 adult LCH patients, 83 with PLCH (median age 36.4 years, 56 females, 38 multisystem disease, 79 single system disease, 65 current smokers) were genotyped for the *BRAF*<sup>V600E</sup> mutation. In 69 cases, LCH lesions were also genotyped by whole-exome sequencing (WES) or targeted gene panel next-generation sequencing (NGS). Cox models were used to estimate the association of baseline characteristics with the hazard of LCH progression.

MAPK pathway alterations were detected in 59 out of 69 cases (86%) (*BRAF*<sup>V600E</sup> mutation: 36%, *BRAF*<sup>N486\_P490</sup> deletion: 28%, *MAP2K1* mutations: 15%, isolated *NRAS*<sup>Q61</sup> mutations: 4%), while *KRAS* mutations were virtually absent in PLCH lesions. The *BRAF*<sup>V600E</sup> mutation was not associated with LCH presentation at diagnosis, including smoking status and lung function, in PLCH patients. *BRAF*<sup>V600E</sup> status did not influence the risk of LCH progression over time.

Thus, MAPK alterations are present in most lesions from adult LCH patients, particularly in PLCH. Unlike reports in paediatric LCH, *BRAF*<sup>V600E</sup> genotyping did not provide additional information on disease outcome. The search for alterations involved in the MAPK pathway, including *BRAF* deletions, is useful for guiding targeted treatment in selected patients with refractory progressive LCH.
